# Supplementary material for: Carbon Fixation in the Chemolithoautotrophic Bacterium Aquifex aeolicus Involves Two Low-Potential Ferredoxins as Partners of the PFOR and OGOR Enzymes
Source: MDPI journal article supplement (doi:10.3390/life13030627), 2023-02-23
Supplement: s1 [file s1]

|                                                                                   |                       |           |           |                | “Stacking” 1 |     |     | “Stacking” 2 |     |     | “S-Trap” 1 |     |     | “S-Trap” 2 |     |     |
|-----------------------------------------------------------------------------------|-----------------------|-----------|-----------|----------------|--------------|-----|-----|--------------|-----|-----|------------|-----|-----|------------|-----|-----|
| ENZYMES                                                                           | SUBUNIT               | ACCESSION | LOCUS TAG | GENE           | PSM          | COV | PEP | PSM          | COV | PEP | PSM        | COV | PEP | PSM        | COV | PEP |
|                                                                                   |                       |           |           |                |              |     |     |              |     |     |            |     |     |            |     |     |
| REVERSE TCA CYCLE                                                                 |                       |           |           |                |              |     |     |              |     |     |            |     |     |            |     |     |
| PFOR                                                                              | Por $\alpha$          | O67254    | aq_1195   | <i>forA1</i>   | 178          | 63  | 20  | 88           | 49  | 14  | 186        | 55  | 15  | 216        | 57  | 16  |
|                                                                                   | Por $\beta$           | O67255    | aq_1196   | <i>forB1</i>   | 44           | 55  | 14  | 38           | 34  | 6   | 63         | 46  | 10  | 46         | 16  | 6   |
|                                                                                   | Por $\gamma$          | O67256    | aq_1200   | <i>forG1</i>   | 84           | 72  | 14  | 62           | 54  | 16  | 50         | 62  | 10  | 86         | 68  | 10  |
|                                                                                   | Por $\epsilon$ (Fdx3) | O67251    | aq_1192A  | <i>forD1</i>   | 11           | 85  | 5   | -            | -   | -   | 40         | 67  | 5   | 7          | 15  | 2   |
|                                                                                   | Por $\delta$          | O67252    | aq_1192   | <i>aq_1192</i> | 43           | 66  | 10  | 21           | 40  | 6   | 26         | 54  | 6   | 46         | 56  | 8   |
| PEP synthase                                                                      | PpsA                  | O67899    | aq_2142   | <i>ppsA</i>    | 220          | 64  | 59  | 181          | 55  | 47  | 11         | 49  | 34  | 163        | 48  | 36  |
| Pyruvate carboxylase (PYC)                                                        | PycA                  | O67544    | aq_1614   | <i>oadA</i>    | 108          | 55  | 35  | 89           | 48  | 30  | 80         | 53  | 21  | 72         | 38  | 16  |
|                                                                                   | PycB                  | O67449    | aq_1470   | <i>accC2</i>   | 64           | 55  | 29  | 48           | 43  | 22  | 23         | 38  | 15  | 42         | 45  | 18  |
| Malate dehydrogenase (MDH)                                                        | Mdh1                  | O67655    | aq_1782   | <i>mdh1</i>    | 85           | 71  | 19  | 62           | 50  | 14  | 83         | 56  | 11  | 119        | 51  | 12  |
|                                                                                   | Mdh2                  | O67581    | aq_1665   | <i>mdh2</i>    | 9            | 27  | 7   | 7            | 16  | 4   | 11         | 23  | 7   | 8          | 7   | 2   |
| Fumarase (FUM)                                                                    | FumA                  | O67654    | aq_1780   | <i>fumB</i>    | 25           | 38  | 12  | 23           | 29  | 11  | 44         | 64  | 14  | 41         | 48  | 13  |
|                                                                                   | FumB                  | O67590    | aq_1679   | <i>fumX</i>    | 21           | 61  | 11  | 38           | 64  | 10  | 16         | 45  | 7   | 32         | 57  | 9   |
| Fumarate reductase (FRD)                                                          | FrdA                  | O66855    | aq_594    | <i>frdA</i>    | 105          | 69  | 38  | 70           | 53  | 29  | 57         | 54  | 26  | 58         | 46  | 21  |
|                                                                                   | FrdB                  | O66828    | aq_553    | <i>frdB1</i>   | 4            | 16  | 3   | 4            | 17  | 3   | 5          | 24  | 4   | 6          | 17  | 3   |
|                                                                                   | FrdC                  | O66518    | aq_116    | <i>aq_116</i>  | 21           | 28  | 12  | 17           | 25  | 11  | 14         | 24  | 9   | 17         | 20  | 10  |
|                                                                                   | FrdD                  | O67007    | aq_835    | <i>nox</i>     | 26           | 59  | 18  | 16           | 30  | 10  | 6          | 23  | 6   | 15         | 37  | 11  |
|                                                                                   | FrdE                  | O66481    | aq_067    | <i>dmsB2</i>   | 5            | 18  | 3   | 2            | 22  | 2   | 3          | 25  | 3   | -          | -   | -   |
| Succinyl-CoA synthetase (SUC)                                                     | SucC                  | O67546    | aq_1620   | <i>sucC</i>    | 97           | 69  | 30  | 71           | 55  | 19  | 100        | 63  | 22  | 83         | 53  | 18  |
|                                                                                   | SucD                  | O67547    | aq_1622   | <i>sucD2</i>   | 105          | 58  | 12  | 91           | 60  | 14  | 69         | 60  | 14  | 82         | 54  | 12  |
| OGOR                                                                              | For $\alpha$          | O67229    | aq_1167   | <i>forA2</i>   | 253          | 72  | 26  | 175          | 68  | 23  | 283        | 67  | 20  | 202        | 56  | 16  |
|                                                                                   | For $\beta$           | O67230    | aq_1168   | <i>forB2</i>   | 76           | 69  | 20  | 59           | 61  | 17  | 107        | 55  | 14  | 111        | 39  | 10  |
|                                                                                   | For $\gamma$          | O67231    | aq_1169   | <i>forG2</i>   | 89           | 92  | 18  | 77           | 66  | 14  | 80         | 79  | 14  | 93         | 90  | 15  |
|                                                                                   | For $\epsilon$ (Fdx2) | O67232    | aq_1171   | <i>forD2</i>   | 30           | 91  | 7   | 14           | 63  | 4   | 36         | 58  | 4   | 15         | 26  | 2   |
|                                                                                   | For $\delta$          | O67228    | aq_1166   | <i>aq-1166</i> | 149          | 84  | 21  | 94           | 63  | 17  | 88         | 75  | 15  | 74         | 52  | 12  |
| 2-Oxoglutarate carboxylase (OGC)                                                  | OgcA (CfiA)           | O67484    | aq_1520   | <i>pycA</i>    | 472          | 74  | 56  | 308          | 65  | 47  | 268        | 65  | 40  | 319        | 62  | 34  |
|                                                                                   | OgcB (CfiB)           | O67483    | aq_1517   | <i>pycB</i>    | 244          | 74  | 33  | 116          | 62  | 26  | 106        | 63  | 20  | 124        | 58  | 21  |
| Oxalosuccinate reductase (OSR)                                                    | Icd                   | O67480    | aq_1512   | <i>icd</i>     | 54           | 48  | 23  | 73           | 49  | 22  | 95         | 51  | 15  | 100        | 52  | 16  |
| Aconitase                                                                         | Aco                   | O67656    | aq_1784   | <i>aco</i>     | 133          | 67  | 38  | 113          | 41  | 24  | 118        | 59  | 27  | 119        | 47  | 23  |
| Citryl-CoA synthetase (CCS)                                                       | CcsA                  | O67330    | aq_1306   | <i>sucC1</i>   | 231          | 77  | 35  | 149          | 61  | 27  | 194        | 61  | 25  | 208        | 56  | 23  |
|                                                                                   | CcsB                  | O67729    | aq_1888   | <i>sucD1</i>   | 164          | 78  | 30  | 154          | 79  | 23  | 137        | 64  | 17  | 139        | 57  | 17  |
| Citryl-CoA lyase (CCL)                                                            | Ccl                   | O66541    | aq_150    | <i>gltA</i>    | 95           | 80  | 21  | 62           | 50  | 14  | 80         | 63  | 13  | 93         | 63  | 14  |
| PUTATIVE INCOMPLETE REDUCTIVE ACETYL-CoA PATHWAY and GLYCINE AND SERINE SYNTHESIS |                       |           |           |                |              |     |     |              |     |     |            |     |     |            |     |     |
| Formate dehydrogenase                                                             | FdoI                  | O67148    | aq_1049   | <i>fdoI</i>    | -            | -   | -   | -            | -   | -   | -          | -   | -   | -          | -   | -   |
|                                                                                   | FdoH                  | O67147    | aq_1046   | <i>fdoH</i>    | 10           | 24  | 6   | 7            | 21  | 4   | 6          | 30  | 5   | -          | -   | -   |
|                                                                                   | FdoG                  | O67146    | aq_1039   | <i>fdoG</i>    | 17           | 14  | 12  | 27           | 24  | 17  | 16         | 21  | 13  | 3          | 4   | 3   |
| FormylTHF deformylase                                                             | PurU                  | O67681    | aq_1818   | <i>purU</i>    | 8            | 41  | 8   | 14           | 45  | 10  | 6          | 29  | 5   | 10         | 31  | 6   |
| 5-FormylTHF cyclo-ligase                                                          | MTHFS                 | O67621    | aq_1731   | <i>aq_1731</i> | -            | -   | -   | -            | -   | -   | -          | -   | -   | -          | -   | -   |
| MethyleneTHF dehydrogenase                                                        | FolD                  | O67736    | aq_1898   | <i>folD</i>    | 18           | 37  | 9   | 16           | 32  | 7   | 9          | 29  | 6   | 15         | 23  | 7   |
| 5,10-methyleneTHF reductase                                                       | MetF                  | O67422    | aq_1429   | <i>metF</i>    | 19           | 49  | 13  | 15           | 30  | 6   | 10         | 31  | 7   | 6          | 19  | 4   |
| Dihydrolipoyl dehydrogenase                                                       | GcvL/Lpd              | O66945    | aq_736    | <i>lpdA</i>    | 54           | 72  | 25  | 85           | 61  | 28  | 48         | 57  | 18  | 82         | 59  | 21  |
| Aminomethyl transferase                                                           | GcvT                  | O67441    | aq_1458   | <i>gcvT</i>    | 27           | 46  | 17  | 20           | 32  | 11  | 11         | 26  | 7   | 14         | 24  | 7   |
| Glycine dehydrogenase (decarboxylating) subunit 1                                 | GcsP2                 | O67193    | aq_1109   | <i>gcvPA</i>   | 32           | 40  | 19  | 20           | 29  | 12  | 10         | 19  | 7   | 16         | 24  | 9   |
| Glycine dehydrogenase (decarboxylating) subunit 2                                 | GcsP1                 | O67740    | aq_1903   | <i>gcvPB</i>   | 30           | 45  | 18  | 31           | 34  | 15  | 27         | 41  | 17  | 29         | 33  | 15  |
| Glycine cleavage system H protein 1                                               | GcsH                  | O67151    | aq_1052   | <i>gcvH1</i>   | -            | -   | -   | -            | -   | -   | 2          | 26  | 2   | 4          | 10  | 2   |

|                                                               |      |        |         |              |    |    |    |    |    |    |    |    |    |    |    |    |
|---------------------------------------------------------------|------|--------|---------|--------------|----|----|----|----|----|----|----|----|----|----|----|----|
| <b>Glycine cleavage system H protein 2</b>                    | GcsH | O67573 | aq_1657 | <i>gcvH2</i> | 3  | 29 | 3  | -  | -  | -  | 19 | 51 | 6  | 18 | 37 | 4  |
| <b>Glycine cleavage system H protein 3</b>                    | GcsH | O67080 | aq_944  | <i>gcvH3</i> | -  | -  | -  | -  | -  | -  | -  | -  | -  | 4  | 32 | 3  |
| <b>Glycine cleavage system H protein 4</b>                    | GcsH | O67192 | aq_1108 | <i>gcvH4</i> | -  | -  | -  | -  | -  | -  | -  | -  | -  | 2  | 25 | 2  |
| <b>Serine hydroxymethyltransferase</b>                        | SHMT | O66776 | aq_479  | <i>glyA</i>  | 63 | 46 | 21 | 53 | 37 | 14 | 27 | 34 | 11 | 38 | 36 | 13 |
| <b>SERINE AND GLYCINE SYNTHESIS via phosphorylated serine</b> |      |        |         |              |    |    |    |    |    |    |    |    |    |    |    |    |
| <b>Phospho-serine phosphatase</b>                             | PspA | O67797 | aq_1990 | <i>pgmA</i>  | 17 | 56 | 10 | 14 | 40 | 6  | 9  | 32 | 6  | 16 | 30 | 6  |
| <b>Serine hydroxymethyltransferase</b>                        | SHMT | O66776 | aq_479  | <i>glyA</i>  | 63 | 46 | 21 | 53 | 37 | 14 | 27 | 34 | 11 | 38 | 36 | 13 |

**Table S1 :** Tandem mass spectrometry identification of proteins involved in the rTCA cycle, the putative linear folate-based pathway of CO<sub>2</sub> reduction or the phosphorylated serine pathway for glycine and serine biosynthesis

Results reported in this table were obtained after protein preparation with the “stacking method” or the “S-Trap method” as described in the Material and Method section. Results are from two independent experiments. 800, 730, 962 and 1046 proteins were identified in “Stacking” 1, “Stacking” 2, “S-Trap” 1 and “S-Trap” 2, respectively. Accession: accession number in UniProt database. PSM: peptide spectrum match number (given by the algorithm corresponding to the total number of identified peptide sequences for the protein, including those redundantly identified. Protein abundance approximation). COV: percent protein sequence coverage by the matching peptides. PEP: number of distinct peptides matching to protein sequence and unique to this protein. The protein GcvH5 (renamed LbpA2 (Cao, 2018), accession number O66720; locus tag aq\_402) was identified by mass spectrometry in the soluble extract but not included in the table because it was proposed to be involved in sulfur oxidation pathway and not in the glycine cleavage system.

#### Reference :

Cao X, Koch T, Steffens L, Finkensieper J, Zigann R, Cronan JE, Dahl C. Lipoate-binding proteins and specific lipoate-protein ligases in microbial sulfur oxidation reveal an atypical role for an old cofactor. *Elife*. 2018;7:e37439. doi: 10.7554/eLife.37439.

| Band<br>Figure 4A | Description             | Subunit      | Accession | Locus<br>Tag | Gene           | MW   | PSM | COV | PEP |
|-------------------|-------------------------|--------------|-----------|--------------|----------------|------|-----|-----|-----|
| 1                 | Alpha subunit PFOR      | Por $\alpha$ | O67254    | aq_1195      | <i>forA1</i>   | 45.1 | 351 | 59  | 14  |
| 2                 | Alpha subunit OGOR      | For $\alpha$ | O67229    | aq_1167      | <i>forA2</i>   | 42.7 | 119 | 46  | 16  |
| 3                 | Beta subunit OGOR       | For $\beta$  | O67230    | aq_1168      | <i>forB2</i>   | 32.6 | 484 | 53  | 16  |
|                   | Beta subunit PFOR       | Por $\beta$  | O67255    | aq_1196      | <i>forB1</i>   | 32.2 | 111 | 35  | 10  |
| 4                 | Gamma subunit OGOR      | For $\gamma$ | O67231    | aq_1169      | <i>forG2</i>   | 25.5 | 457 | 89  | 17  |
|                   | Gamma subunit PFOR      | Por $\gamma$ | O67256    | aq_1200      | <i>forG1</i>   | 26.7 | 69  | 54  | 13  |
|                   | Delta subunit OGOR      | For $\delta$ | O67228    | aq_1166      | <i>aq_1166</i> | 27.6 | 239 | 73  | 17  |
| 5                 | Fd7-Streptag            |              | -         | -            | <i>fdx7</i>    | 11   | 40  | 72  | 5   |
| 6                 | Uncharacterized protein |              | O67227    | aq_1163      | <i>aq_1163</i> | 14.9 | 217 | 65  | 9   |
| 7                 | Fd7-Streptag            |              | -         | -            | <i>fdx7</i>    | 11   | 42  | 34  | 4   |

**Table S2** : Tandem mass spectrometry identification of proteins occurring in the seven major bands of the denaturing gel shown in Figure 4A (elution from the pulldown assay).

Only subunits of PFOR (in red), proteins related to the OGOR (in green) and the Fd7 are reported in the table. Accession: accession number in UniProt database. MW: theoretical molecular weight of the identified protein in kDa. PSM: peptide spectrum match number (given by the algorithm corresponding to the total number of identified peptide sequences for the protein, including those redundantly identified. Protein abundance approximation). COV: percent protein sequence coverage by the matching peptides. PEP: number of distinct peptides matching to protein sequence and unique to this protein.

| Description                      | Subunit        | Accession | Locus Tag | Gene           | MW    | PSM  | COV | PEP |
|----------------------------------|----------------|-----------|-----------|----------------|-------|------|-----|-----|
| <b>OGOR activity band</b>        |                |           |           |                |       |      |     |     |
| Alpha subunit OGOR               | For $\alpha$   | O67229    | aq_1167   | <i>forA2</i>   | 42.7  | 848  | 75  | 32  |
| Gamma subunit OGOR               | For $\gamma$   | O67231    | aq_1169   | <i>forG2</i>   | 25.5  | 623  | 93  | 20  |
| Beta subunit OGOR                | For $\beta$    | O67230    | aq_1168   | <i>forB2</i>   | 32.6  | 397  | 69  | 21  |
| Delta subunit OGOR               | For $\delta$   | O67228    | aq_1166   | <i>aq_1166</i> | 27.6  | 346  | 79  | 20  |
| Alpha subunit PFOR               | Por $\alpha$   | O67254    | aq_1195   | <i>forA1</i>   | 45.1  | 292  | 68  | 19  |
| Beta subunit PFOR                | Por $\beta$    | O67255    | aq_1196   | <i>forB1</i>   | 32.2  | 130  | 40  | 13  |
| Epsilon subunit OGOR             | For $\epsilon$ | O67232    | aq_1171   | <i>forD2</i>   | 9     | 128  | 91  | 10  |
| Gamma subunit PFOR               | Por $\gamma$   | O67256    | aq_1200   | <i>forG1</i>   | 26.7  | 102  | 42  | 13  |
| Delta subunit PFOR               | Por $\delta$   | O67252    | aq_1192   | <i>aq_1192</i> | 21.3  | 63   | 45  | 7   |
| Uncharacterized protein          |                | O67227    | aq_1163   | <i>aq_1163</i> | 14.9  | 49   | 69  | 9   |
| Glutamate synthase small subunit |                | O67845    | aq_2064   | <i>gltD</i>    | 52.9  | 24   | 45  | 18  |
| Uncharacterized protein          |                | O66853    | aq_591    | <i>aq_591</i>  | 39.2  | 14   | 39  | 11  |
| Reverse gyrase 2                 |                | O67226    | aq_1159   | <i>rgy2</i>    | 134.5 | 13   | 10  | 11  |
| Reverse gyrase 1                 |                | O67037    | aq_886    | <i>rgy1</i>    | 132.4 | 9    | 8   | 9   |
| Fd7-Streptag                     |                | -         | -         | <i>fdx7</i>    | 11    | 9    | 34  | 3   |
| Epsilon subunit PFOR             | Por $\epsilon$ | O67251    | aq_1192a  | <i>forD1</i>   | 9.1   | 8    | 58  | 6   |
| <b>PFOR activity band</b>        |                |           |           |                |       |      |     |     |
| Alpha subunit PFOR               | Por $\alpha$   | O67254    | aq_1195   | <i>forA1</i>   | 45.1  | 1130 | 73  | 27  |
| Alpha subunit OGOR               | For $\alpha$   | O67229    | aq_1167   | <i>forA2</i>   | 42.7  | 722  | 70  | 28  |
| Beta subunit PFOR                | Por $\beta$    | O67255    | aq_1196   | <i>forB1</i>   | 32.2  | 459  | 59  | 16  |
| Gamma subunit OGOR               | For $\gamma$   | O67231    | aq_1169   | <i>forG2</i>   | 25.5  | 380  | 89  | 18  |
| Delta subunit OGOR               | For $\delta$   | O67228    | aq_1166   | <i>aq_1166</i> | 27.6  | 317  | 73  | 19  |
| Beta subunit OGOR                | For $\beta$    | O67230    | aq_1168   | <i>forB2</i>   | 32.6  | 283  | 60  | 21  |
| Gamma subunit PFOR               | Por $\gamma$   | O67256    | aq_1200   | <i>forG1</i>   | 26.7  | 260  | 61  | 16  |
| Delta subunit PFOR               | Por $\delta$   | O67252    | aq_1192   | <i>aq_1192</i> | 21.3  | 249  | 65  | 11  |
| Glutamate synthase small subunit |                | O67845    | aq_2064   | <i>gltD</i>    | 52.9  | 115  | 64  | 26  |
| Epsilon subunit OGOR             | For $\epsilon$ | O67232    | aq_1171   | <i>forD2</i>   | 9     | 75   | 73  | 8   |
| Epsilon subunit PFOR             | Por $\epsilon$ | O67251    | aq_1192a  | <i>forD1</i>   | 9.1   | 30   | 58  | 6   |
| Uncharacterized protein          |                | O66853    | aq_591    | <i>aq_591</i>  | 39.2  | 29   | 45  | 14  |
| Uncharacterized protein          |                | O67227    | aq_1163   | <i>aq_1163</i> | 14.9  | 19   | 65  | 8   |
| Reverse gyrase 2                 |                | O67226    | aq_1159   | <i>rgy2</i>    | 134.5 | 16   | 13  | 14  |
| Fd7-Streptag                     |                | -         | -         | <i>fdx7</i>    | 11    | 12   | 34  | 4   |

**Table S3:** Tandem mass spectrometry identification of proteins occurring in the bands revealed by PFOR and OGOR activity on the BN gel (Figure 4B, marked with a \*). The 16 and 14 best hits are shown for the OGOR (in green) and the PFOR (in red) respectively, and the Fd7-Strep (20th best hit) was also reported for the PFOR. 38 and 72 proteins were identified in total in both bands. Accession: accession number in UniProt database. MW: theoretical molecular weight of the identified protein in kDa.

PSM: peptide spectrum match number (corresponding to the total number of identified peptide sequences for the protein, including those redundantly identified. Protein abundance approximation). COV: percent protein sequence coverage by the matching peptides. PEP: number of distinct peptides matching to protein sequence and unique to this protein.
